# Supplementary material for: Black TiO2−x with stable surface oxygen vacancies as the support of efficient gold catalysts for water-gas shift reaction
Source: Royal Society of Chemistry journal article supplement (doi:10.1039/c7cy02429k), 2018-01-01
Supplement: c7cy02429k1.pdf [file c7cy02429k1.pdf]

# 1 **Black TiO<sub>2-x</sub> with Stable Surface Oxygen Vacancies as the Support of Efficient** 2 **Gold Catalysts for Water-Gas Shift Reaction**

3 Lei Li,<sup>\*†</sup> Li Song,<sup>†</sup> Longfeng Zhu, Zheng Yan and Xuebo Cao<sup>\*</sup>

4 College of Biological, Chemical Sciences and Engineering, Jiaxing University, Jiaxing, Zhejiang  
5 314001, China

6 <sup>\*</sup>Corresponding author, E-mail addresses: [leili@mail.zjxu.edu.cn](mailto:leili@mail.zjxu.edu.cn) (L. Li), [xbcao@mail.zjxu.edu.cn](mailto:xbcao@mail.zjxu.edu.cn) (X.  
7 Cao).

8 <sup>†</sup> These authors contributed equally.

## 10 **Characterization**

11 Powder XRD patterns of the as-synthesized samples were recorded by a PANalytical X'pert Pro  
12 diffractometer equipped with Cu-K $\alpha$  ( $\lambda = 0.1541$  nm) radiation (X'Celerator detector) operating at 40  
13 kV and 40 mA with a scanning rate of 0.12 °/min. For Rietveld analysis, the XRD pattern of standard  
14 reference material (NIST 640A silicon), which is a material with no microstrain nor size broadening,  
15 was measured from 10° to 140° on the same instrument with the same experimental parameters. The  
16 patterns of the standard and experimental samples were fitted with a pseudo-Voigt function (PVF),  
17 which were carried out with X'pert highscore plus software. The actual Au loading in each catalyst  
18 was measured by ICP-OES using a Varian 710-ES analyzer. The morphology was examined by using  
19 field emission scanning electron microscopy (SEM, Hitachi S-4800) and transmission electron  
20 microscopy (TEM, JEM-2100). Gold cluster size distributions were measured using >200 particles for  
21 each sample to determine surface-averaged cluster diameters ( $d_{\text{TEM}}$ ):<sup>74</sup>

$$22 \quad d_{\text{TEM}} = \frac{\sum n_i d_i^3}{\sum n_i d_i^2}$$

23 where  $n_i$  is the number of clusters with diameter  $d_i$ . Metal dispersions (D), defined as the fraction of

1 Au atoms exposed at cluster surfaces, and were estimated from  $d_{\text{TEM}}$ :

$$2 \quad D = 6 \frac{v_m/a_m}{d_{\text{TEM}}}$$

3 where  $v_m$  is the bulk atomic density of Au ( $16.49 \times 10^{-3} \text{ nm}^{-3}$ ) and  $a_m$  is the area occupied by an Au  
4 atom ( $8.75 \times 10^{-2} \text{ nm}^2$ ) on a polycrystalline surface.<sup>74</sup>

5 Raman spectra were collected at room temperature on a Renishaw Invia Plus instrument using a  
6 semiconductor laser as an illumination source (532 nm). The electron paramagnetic resonance (EPR)  
7 spectra were collected using a Bruker EMX-8 spectrometer at room temperature. The settings were  
8 center field, 3510 G; microwave frequency, 9.859 GHz; and power, 10.02 mW. The X-ray  
9 photoelectron spectroscopy (XPS) measurements were performed on a VG ESCALAB 250  
10 spectrophotometer with Al K $\alpha$  radiation (1486.6 eV), operating at 15kV  $\times$  10 mA, in FAT mode  
11 (Fixed Analyser Transmission), with a pass energy of 30 eV for regions ROI and 100 eV for survey.  
12 The base pressure of the main chamber was kept at about  $1 \times 10^{-9}$  mbar. Each sample was first placed  
13 in a copper holder mounted on a sample-rod in the pretreatment chamber of the spectrometer, and it  
14 was then outgassed at 100 °C for 1 h before being transferred to the analysis chamber. A flood gun  
15 was always used for charge compensation. The spot size is 500  $\mu\text{m}$  and each high-resolution spectrum  
16 was scanned for ten times with an energy step size of 0.05 eV. All binding energies (BE) were  
17 calibrated by using that of C 1 s (284.5 eV). The peaks obtained after a Shirley background  
18 subtraction were fitted to Lorentzian-Gaussian curves using a public software XPSPEAK version 4.1.

19 The BET surface area, pore volume and pore size distribution were measured by using nitrogen  
20 as adsorption gas at 77 K on a Micrometrics ASAP 2020 instrument. Temperature-programmed  
21 reduction (TPR) measurements were carried out on an AutoChem 2910 apparatus equipped with a  
22 thermal conductivity detector (TCD) for analysis. 50 mg of each sample was purged with high purity  
23 argon gas at 110 °C for 1 h, and cooled under the same gas flow to room temperature, finally reduced  
24 by H<sub>2</sub>/Ar (H<sub>2</sub>: 10 vol. %) with a flow of 30 mL/min in the temperature range of 50-600 °C at a heating  
25 rate of 10 °C/min. Diffuse reflectance spectroscopy (DRS) was measured on Agilent Cary 5000 UV-  
26 vis spectrophotometer in the range of 200-800 nm. The band gaps were estimated by extrapolating a

1 linear part of the plots to  $(\alpha h\nu)^{0.5} = 0$ . The photoluminescence (PL) spectra were obtained using  
 2 Hitachi F-4500 fluorescence spectrophotometer with optical filter and the excitation wavelength at  
 3 300 nm. Mott-Schottky plots were derived from impedance-potential at a frequency of 10 KHz by a  
 4 CHI 660D electrochemical station in the dark. 1M NaOH aqueous solution (pH = 13.6) was used as an  
 5 electrolyte. Saturated calomel electrode (SCE) and Pt wire were used as reference and counter  
 6 electrode, respectively.

7

8 **Table S1. Physical properties of Au-TiO<sub>2</sub> and Au-TiO<sub>2-x</sub> catalysts**

| Catalysts                | Au loading<br>(wt. %) <sup>a</sup> | Dispersion<br>(%) <sup>b</sup> | TOF at 240 °C<br>(s <sup>-1</sup> ) | TOF at 200 °C<br>(s <sup>-1</sup> ) |
|--------------------------|------------------------------------|--------------------------------|-------------------------------------|-------------------------------------|
| Au-TiO <sub>2</sub> -A   | 4.1                                | 10                             | 1.89                                | 0.74                                |
| Au-TiO <sub>2-x</sub> -A | 4.0                                | 9.7                            | 3.49                                | 1.43                                |

9 a Measured by ICP-OES.

10 b Measured by TEM.

11

12

13

14 **Table S2 Comparison of water-gas shift rates of Au-TiO<sub>2-x</sub>-A catalysts with literature data.**

| Catalysts                              | Conditions                                                                           | T<br>(°C) | Ea<br>(kJ/mo<br>l) | TOF (s <sup>-1</sup> ) | Rate<br>(μmol/g s)                                            | Ref.                                                      |
|----------------------------------------|--------------------------------------------------------------------------------------|-----------|--------------------|------------------------|---------------------------------------------------------------|-----------------------------------------------------------|
| 4 wt.<br>%Au-<br>TiO <sub>2-x</sub> -A | 6.25% CO, 50% H <sub>2</sub> O,<br>43.75% N <sub>2</sub>                             | 200       | 45.4±2<br>.2       | 1.43                   | 14.4                                                          | This work                                                 |
| 4 wt.<br>%Au-<br>TiO <sub>2-x</sub> -A | 6.25% CO, 50% H <sub>2</sub> O,<br>43.75% N <sub>2</sub>                             | 240       | 45.4±2<br>.2       | 3.49                   | 41.1                                                          | This work                                                 |
| 0.51<br>AuP25_U<br>V_L                 | 11% CO, 26% H <sub>2</sub> O, 7%<br>CO <sub>2</sub> , 26% H <sub>2</sub> in He       | 200       | 45.2               | 0.2                    | 6.3                                                           | <i>J. Am. Chem. Soc.</i><br><b>2013</b> , 135, 3768-3771. |
| 2.3 wt.%<br>Au/TiO <sub>2</sub>        | 7% CO, 11% H <sub>2</sub> O, 9%<br>CO <sub>2</sub> , 37% H <sub>2</sub> , balance He | 120       | 56 ± 3             |                        | 0.011 (mol<br>H <sub>2</sub> ) (mol Au)<br>-1 s <sup>-1</sup> | <i>J. Catal.</i> <b>2012</b> , 289,<br>171-178.           |
| Au-TiO <sub>2</sub>                    | 6.8% CO, 21.9% H <sub>2</sub> O,                                                     | 120       | 45-60              |                        | 0.1 (mol H <sub>2</sub> )                                     | <i>J. Am. Chem. Soc.</i>                                  |

|                                                             |                                                                                                                                         |     |        |                        |                                                                    |                                                                     |
|-------------------------------------------------------------|-----------------------------------------------------------------------------------------------------------------------------------------|-----|--------|------------------------|--------------------------------------------------------------------|---------------------------------------------------------------------|
|                                                             | 8.5% CO <sub>2</sub> , 37.4% H <sub>2</sub> ,<br>balance Ar                                                                             |     |        |                        | (mol Au) <sup>-1</sup> s <sup>-1</sup>                             | <b>2012</b> , 134, 4700-4708.                                       |
| Au/TiO <sub>2</sub><br>(DP,<br>3.4%)                        | 1% CO, 2% H <sub>2</sub> O, He<br>(balance)                                                                                             | 100 | 46     | 0.00079                | 0.1                                                                | <i>Chem. Commun.</i> <b>1997</b> ,<br>271-272.                      |
| 1.5 wt.%<br>Au-TiO <sub>2</sub>                             | 4.76%CO, 10.06% CO <sub>2</sub> ,<br>28.46% H <sub>2</sub> , 35.38% H <sub>2</sub> O,<br>21.34% N <sub>2</sub>                          | 300 |        | 0.18                   |                                                                    | <i>Int. J. Hydrogen<br/>Energ.</i> <b>2016</b> , 41, 4670-<br>4681. |
| Au/TiO <sub>2</sub> -<br>Ni 1                               | 5% CO, 10%H <sub>2</sub> O in He<br>balance                                                                                             | 300 |        | 0.0053 h <sup>-1</sup> |                                                                    | <i>RSC Adv.</i> <b>2014</b> , 4,<br>4308-4316.                      |
| 0.5<br>wt.%Pt/N<br>a-TiO <sub>2</sub>                       | 3% CO and 10% H <sub>2</sub> O<br>(balance He)                                                                                          | 250 | 71     | 1.58                   | 38.4                                                               | <i>J. Catal.</i> <b>2009</b> , 267,<br>57-66.                       |
| Pt/Na-<br>TiO <sub>2</sub>                                  | 2.83% CO, 5.66% H <sub>2</sub> O,<br>37.74% H <sub>2</sub> , 53.77% He                                                                  | 250 | 80     | 1.39                   | 20                                                                 | <i>J. Catal.</i> <b>2011</b> , 278,<br>123-132.                     |
| 0.5%<br>Pt/CaO-<br>TiO <sub>2</sub>                         | 3% CO and 10% H <sub>2</sub> O<br>(balance He)                                                                                          | 220 | 72.8   | 0.38                   | 9.52                                                               | <i>Appl. Catal. B-<br/>Environ.</i> <b>2011</b> , 101,<br>738-746.  |
| 30Na:Pt/<br>Al <sub>2</sub> O <sub>3</sub>                  | 7% CO, 11% H <sub>2</sub> O, 9%<br>CO <sub>2</sub> , 37% H <sub>2</sub> , 10% Ar,<br>balance He                                         | 250 | 77     | 0.35                   | 7.6(mol H <sub>2</sub> )<br>(mol Pt) <sup>-1</sup> s <sup>-1</sup> | <i>J. Catal.</i> <b>2016</b> , 339,<br>163-172.                     |
| Pt/Ce <sub>0.75</sub> Z<br>r <sub>0.25</sub> O <sub>2</sub> | 5% H <sub>2</sub> , 15% CO, 5% CO <sub>2</sub> ,<br>20% H <sub>2</sub> O, and balance N <sub>2</sub><br>plus 50 ppm of H <sub>2</sub> S | 200 | 47 ± 6 | 0.0337                 |                                                                    | <i>J. Catal.</i> <b>2016</b> , 341, 1-<br>12.                       |
| 3.7%<br>Pt/Mo <sub>2</sub> C                                | 11% CO, 21% H <sub>2</sub> O, 6%<br>CO <sub>2</sub> , 43% H <sub>2</sub> , 19% N <sub>2</sub>                                           | 240 | 49 ± 4 | 0.72                   | 1.3(mol H <sub>2</sub> )<br>(mol Pt) <sup>-1</sup> s <sup>-1</sup> | <i>J. Catal.</i> <b>2015</b> , 330,<br>280-287.                     |
| 1.5%<br>Pt/Mo <sub>2</sub> C                                | 7% CO, 8.5% CO <sub>2</sub> , 22%<br>H <sub>2</sub> O, 37.5% H <sub>2</sub> , balance Ar                                                | 120 | 48     |                        | 1.8                                                                | <i>J. Catal.</i> <b>2015</b> , 331,<br>162-171.                     |
| 0.01<br>wt.%<br>Ir/FeO <sub>x</sub>                         | 2% CO, 10% H <sub>2</sub> O in He                                                                                                       | 300 | 50     | 2.31                   |                                                                    | <i>J. Am. Chem. Soc.</i><br><b>2013</b> , 135, 15314-<br>15317.     |
| 5Ni5Cu/<br>CeO <sub>2</sub>                                 | 7% CO, 22% H <sub>2</sub> O, 10%<br>CO <sub>2</sub> , 20% H <sub>2</sub> , balance He                                                   | 350 | 41.3   | 0.013                  |                                                                    | <i>J. Catal.</i> <b>2014</b> , 314,<br>32-46.                       |

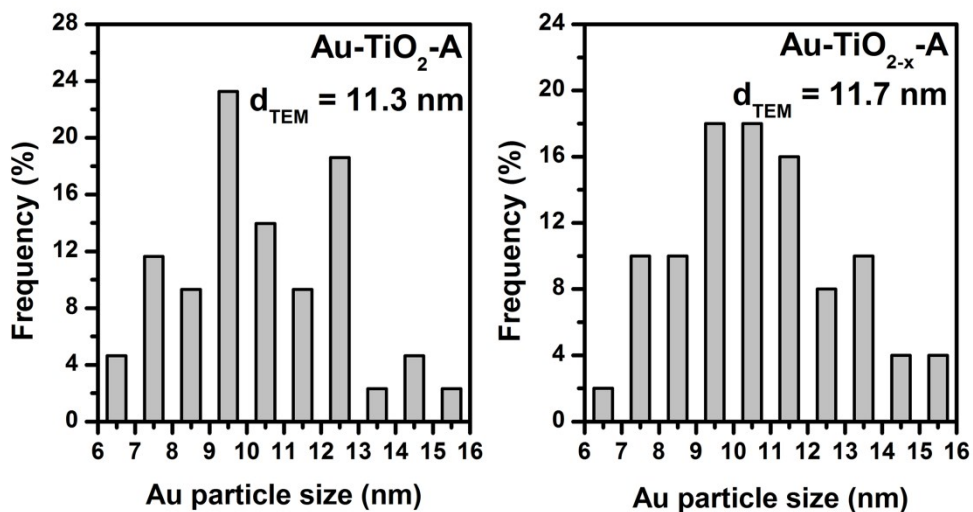

1  
 2 Figure S1. Surface-averaged Au cluster diameters ( $d_{\text{TEM}}$ ) and cluster diameter distributions of  
 3 Au-TiO<sub>2</sub> and Au-TiO<sub>2-x</sub> catalysts

4  
 5

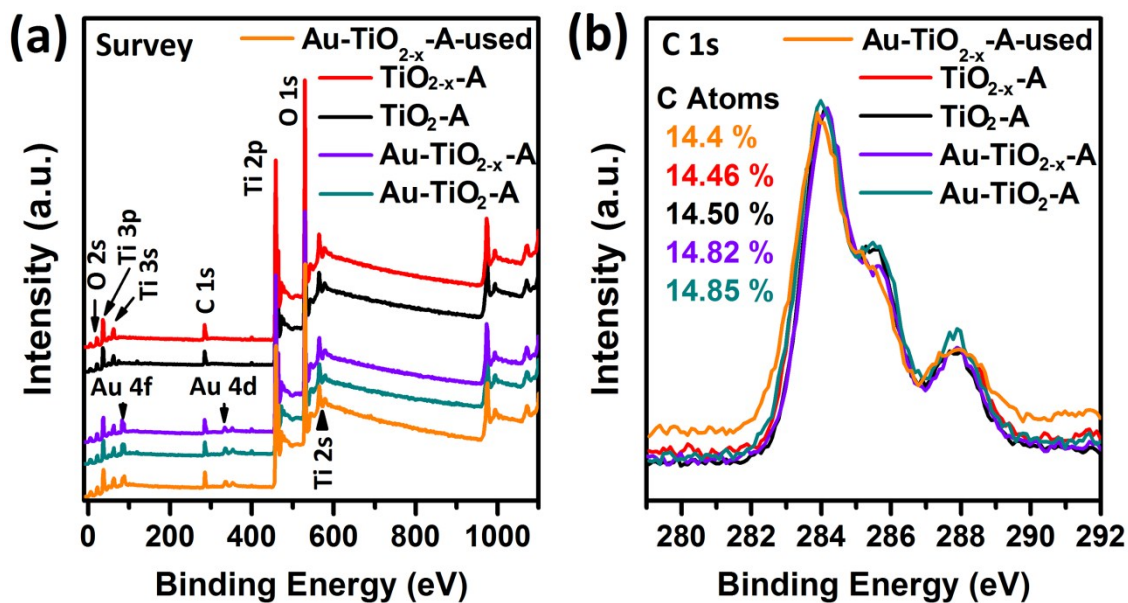

6  
 7 Figure S2. XPS spectra of various TiO<sub>2</sub> supports and Au-TiO<sub>2</sub> catalysts.

8  
 9

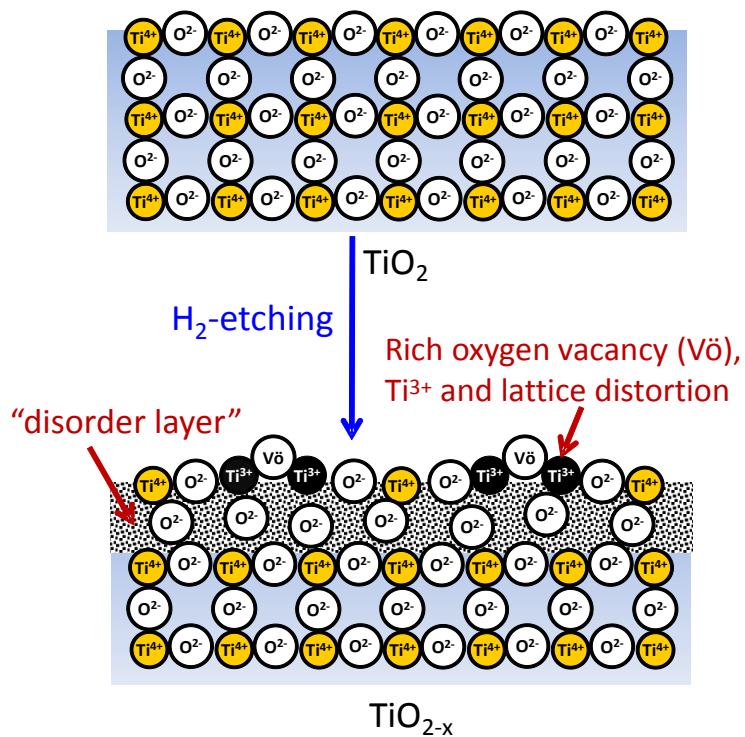

Figure S3. Schematic structure of white and black  $\text{TiO}_2$ .

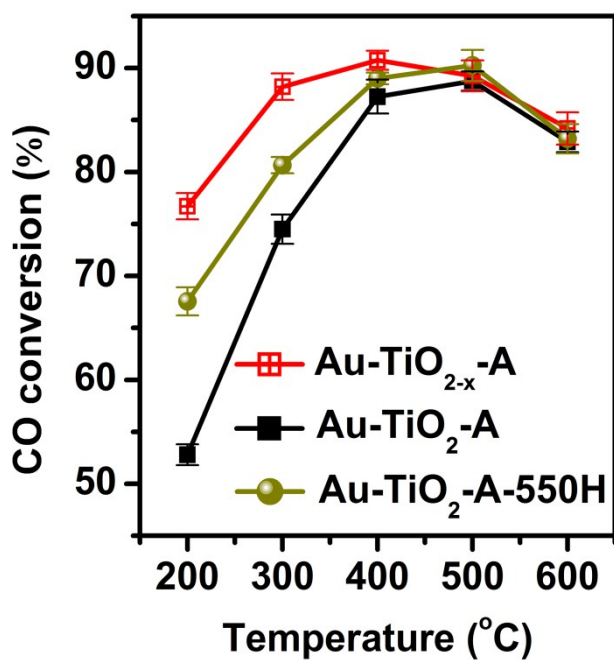

Figure S4. The CO conversions of Au-TiO<sub>2</sub>-550H compared with Au-TiO<sub>2</sub>-A and Au-TiO<sub>2-x</sub>-A catalysts.

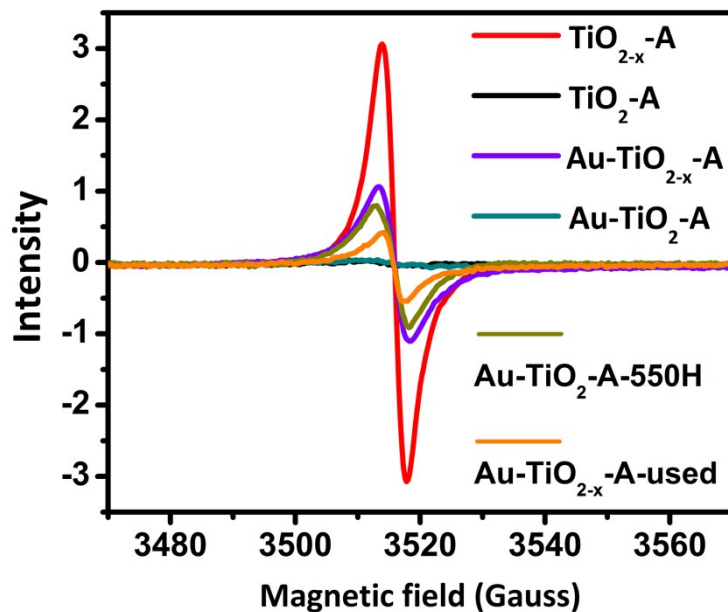

1

2 **Figure S5. EPR spectra of Au-TiO<sub>2</sub>-550H compared with Au-TiO<sub>2</sub>-A and Au-TiO<sub>2-x</sub>-A catalysts.**

3

4

5

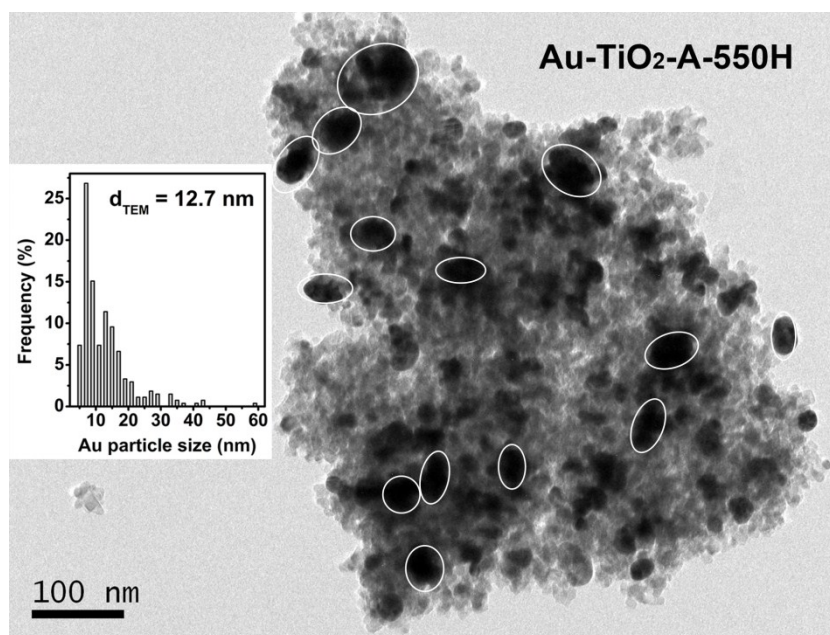

6

7 **Figure S6. TEM images, surface-averaged Au cluster diameters ( $d_{\text{TEM}}$ ) and cluster diameter**  
 8 **distributions of Au-TiO<sub>2</sub>-A-550H catalysts**

9

10

11

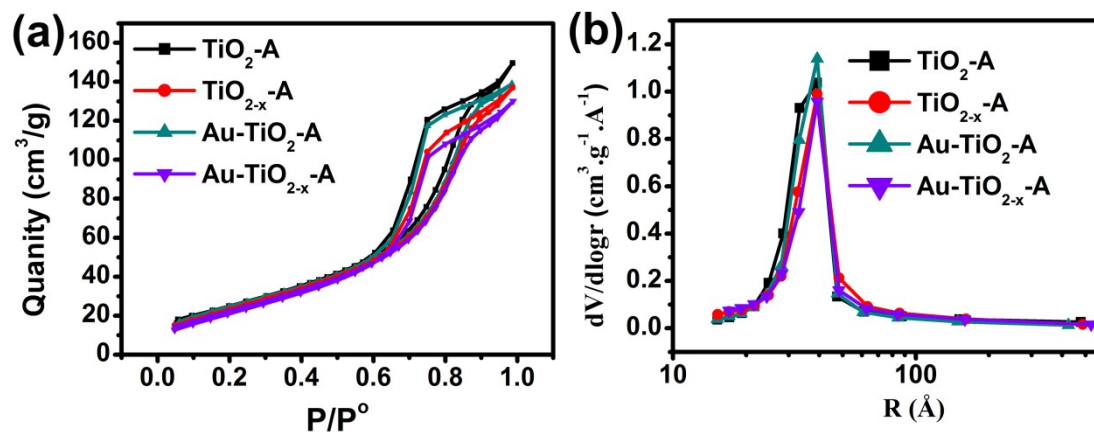

1  
2 **Figure S7. Adsorption-desorption isotherms (a) and pore size distribution (b) of various TiO<sub>2</sub>**  
3 **supports and Au-TiO<sub>2</sub> catalysts.**

4 By comparison, hydrogen-etching technology has hardly obvious effect on adsorption-desorption  
5 isotherms and pore size distribution of TiO<sub>2</sub> supports and Au-TiO<sub>2</sub> catalysts.

6 **Table S3 Texture properties of various TiO<sub>2</sub> supports and Au-TiO<sub>2</sub> catalysts.**

| Sample                   | S <sub>BET</sub><br>(m <sup>2</sup> /g) | Total pore<br>volume (cm <sup>3</sup> /g) | Average pore<br>radius (Å) |
|--------------------------|-----------------------------------------|-------------------------------------------|----------------------------|
| TiO <sub>2</sub> -A      | 95.1                                    | 0.231                                     | 48.6                       |
| TiO <sub>2-x</sub> -A    | 92.7                                    | 0.212                                     | 45.7                       |
| Au-TiO <sub>2</sub> -A   | 96.1                                    | 0.215                                     | 44.8                       |
| Au-TiO <sub>2-x</sub> -A | 89.4                                    | 0.201                                     | 45.0                       |

7  
8 Finally, hydrogen-etching technology also has little effect on S<sub>BET</sub>, total pore volume and average  
9 pore radius of TiO<sub>2</sub> supports and Au-TiO<sub>2</sub> catalysts.

10 Therefore, the differences in WGS catalytic activities should not be attributed to their difference  
11 of texture properties but surface structure and optoelectric properties.

12  
13 **Calculation on heat and mass transfer limitation**

14 We calculated the heat and mass transfer limitation, according to the literatures (*Mass and heat*  
15 *transfer in catalytic reactions, Catalysis Today, 1999, 52, 147-152, and Tests for Transport*  
16 *limitations in Experimental Catalytic Reactors,*



1 *Ind. Eng. Chern. Process Des. Develop.*, 1971, 10(4), 541-547.). The fundamental data are from *CRC*  
2 *Handbook of Chemistry and Physics* (95th Edition). The detailed calculations of Au-TiO<sub>2-x</sub>-A catalyst  
3 at 473.15 K were presented as follows:

4 To ensure that kinetic data obtained in an experimental reactor reflect only chemical events,  
5 temperature and concentration gradients must be virtually eliminated from three domains:

6 Intraparticle within individual catalyst particles;

7 Interphase between the external surface of the particles and fluid adjacent to them;

8 Interparticle between the local fluid regions or catalyst particles.

9 The objective has been to calculate an effectiveness factor,  $\eta$ , defined as the ratio of the actual rate  
10 to that which would occur if the temperature and concentration were constant throughout the catalyst  
11 particle. To eliminate temperature and concentration gradients, it is necessary to ensure  $\eta \geq 0.95$ .

12 The calculated results suggest that external diffusion limitation, internal diffusion limitation,  
13 interphase heat transfer limitation and interparticle heat transfer limitation have been eliminated.

## 14 **1. Eliminating mass transfer limitation**

15 To eliminate mass transfer limitation, we have kept low CO conversion (below 12%) by decreasing  
16 the catalyst weight and particle diameter (100 - 120 mesh) and adjusting the flow rate of feed gas.

### 17 **1.1 Eliminating external diffusion limitation**

18 The criterion can be expressed in terms of Damköhler number:

$$19 \quad \ddot{R} r_p / C_b k_c < 0.15 / n$$

20 where  $\ddot{R}$  (mol·s<sup>-1</sup>·cm<sup>-3</sup>) is the observed reaction rate per unit particle volume,  $r_p$  (cm) is the radius of  
21 the particle (100 mesh / 2 = 0.0075 cm),  $C_b$  (5.6×10<sup>-6</sup> mol·cm<sup>-3</sup>) is the bulk fluid concentration,  $k_c$   
22 (cm·s<sup>-1</sup>) is mass transfer coefficient between gas and particle, and  $n$  is the reaction order. Hereinto,  $k_c$   
23 was calculated as follows:

1 Reynolds numbers ( $Re = D_p \rho u_s / \mu$ ):

$$2 \quad Re = \frac{0.015 \times 0.72 \times 10^3 \times 8}{24.7 \times 10^{-6}} = 3.5$$

3 where  $D_p$  (cm) is the catalyst particle diameter (100 mesh = 0.015 cm),  $\rho$  ( $0.72 \times 10^{-3} \text{ g}\cdot\text{cm}^{-3}$ ) is the  
4 density of CO,  $u_s$  ( $\text{cm}\cdot\text{s}^{-1}$ ) is the superficial flow rate of the fluid ( $8 \text{ cm}\cdot\text{s}^{-1}$ ).  $\mu$  ( $24.7 \times 10^{-6} \text{ Pa}\cdot\text{s}$ ) is the  
5 viscosity of CO.

6 For gaseous reactants,  $3 < Re < 2000$  and  $0.416 < \epsilon < 0.788$ ,

$$7 \quad j_D \epsilon = 0.357 Re^{-0.359} = 0.228$$

$$8 \quad j_D = 0.228 / 0.5 = 0.455$$

9 where  $\epsilon$  (0.5) is the interparticle void fraction of the bed of particles.

$$10 \quad j_D = \frac{k_c}{u_s} \left( \frac{\mu}{\rho D} \right)^{0.67} = \frac{k_c}{8} \left( \frac{24.7 \times 10^{-6}}{0.72 \times 10^{-3} \times 0.491} \right)^{0.67}$$

11 where  $D$  ( $0.491 \text{ cm}^2\cdot\text{s}^{-1}$ ) the diffusion coefficient of the reactant (CO in  $\text{N}_2$ ).

$$12 \quad k_c = 21.6 \text{ cm}\cdot\text{s}^{-1}$$

$$13 \quad \frac{\ddot{R} r_p}{C_b k_c} = \frac{1.1 \times 10^{-4} \times 0.0075}{21.6 \times 5.6 \times 10^{-6}} = 0.007 < \frac{0.15}{n} = \frac{0.15}{1}$$

14 where  $n = 1$  (first-order reaction).

15 Therefore, the external diffusion had been eliminated.

## 16 1.2 Eliminating internal diffusion

17 The criterion requires:

$$18 \quad \ddot{R} r_p^2 / C_s D_e < 1$$

19 where  $C_s$  ( $5.25 \times 10^{-6} \text{ mol}\cdot\text{cm}^{-3}$ ) is the reactant concentration at the external surface of particle,  $D_e$   
20 ( $\text{cm}^2\cdot\text{s}^{-1}$ ) is effective diffusion coefficient. Hereinto,  $D_e$  was calculated as follows:

$$21 \quad 1 / D_e = 1 / D_{b,e} + 1 / D_{k,e}$$

22 where  $D_{b,e}$  and  $D_{k,e}$  are the effective diffusion coefficients for bulk and Knudsen diffusion,

1 respectively. They can be calculated by the following equations:

$$2 \quad D_{b,e} = D_b \theta / \tau = 0.491 \times 0.5 / 4 = 0.0614$$

$$3 \quad D_{k,e} = 1.94 \times 10^4 \frac{\theta^2}{\tau S_g \rho_p \sqrt{M}} \sqrt{\frac{T}{M}} = 1.94 \times 10^4 \frac{0.5^2}{4 \times 89.4 \times 10^4 \times 4 \sqrt{\frac{473.15}{28}}} = 0.0014$$

4 where  $D_b$  ( $\text{cm}^2 \cdot \text{s}^{-1}$ ) is the bulk diffusion coefficient,  $\theta$  the internal void fraction of the solid particle,  $\tau$   
5 the tortuosity factor of the pores,  $S_g$  ( $\text{cm}^2 \cdot \text{g}^{-1}$ ) the specific surface area of the catalyst,  $\rho_p$  ( $\text{g} \cdot \text{cm}^{-3}$ ) the  
6 particle density,  $T$  (K) the reaction temperature and  $M$  ( $\text{g} \cdot \text{mol}^{-1}$ ) the molecular mass of the diffusing  
7 species. A value of ca. 0.5 and of ca. 4 can be attributed to  $\theta$  and  $\tau$ , respectively.

$$8 \quad D_e = 0.0014$$

$$9 \quad \frac{\tilde{R} r_p^2}{C_s D_e} = \frac{1.1 \times 10^{-4} \times 0.0075^2}{5.25 \times 10^{-6} \times 0.0014} = 0.8 < 1$$

10 Therefore, the internal diffusion had been eliminated.

## 11 **2. Eliminating heat transfer limitation**

12 To eliminate heat transfer limitation, we have diluted the catalyst with low surface area quartz sands  
13 and used the tubular reactor with small diameter (7mm). The magnitudes of the heat transport  
14 resistances in experimental reactors are generally in the order: interparticle > interphase > intraparticle.  
15 The effect of temperature distribution within a catalyst particle is usually very less and can be  
16 negligible.

### 17 **2.1. Eliminating interphase heat transfer limitation**

18 The criterion requires:

$$19 \quad \left| \frac{-\Delta H \tilde{R} r_p}{h T_b} \right| < 0.15 \frac{R T_b}{E}$$

20 where  $\Delta H$  ( $41.7 \times 238.9 \text{ cal} \cdot \text{mol}^{-1}$ ) is heat of chemical reaction,  $T_b$  is the temperature of the bulk fluid,  
21 and  $h$  ( $\text{cal} \cdot \text{s}^{-1} \cdot \text{cm}^{-2} \cdot \text{K}^{-1}$ ) is the heat transfer coefficient,  $R$  ( $8.314 \times 0.2389 \text{ cal} \cdot \text{mol}^{-1} \cdot \text{K}^{-1}$ ) is gas constant,  
22  $E$  ( $45.4 \times 238.9 \text{ cal} \cdot \text{mol}^{-1}$ ) is intrinsic activation energy. Hereinto,  $h$  was calculated as follows:

$$j_H = \frac{h}{c_p \rho u_s} \left( \frac{C_p \mu}{k} \right)^{0.67} = \frac{h}{1.04 \times 0.72 \times 10^{-3} \times 8} \left( \frac{1.04 \times 24.7 \times 10^{-6}}{3.73} \right)^{0.67}$$

where  $C_p$  ( $1.04 \text{ J} \cdot \text{g}^{-1} \cdot \text{K}^{-1}$ ) is the heat capacity of CO,  $k$  ( $3.73 \text{ W} \cdot \text{cm}^{-1} \cdot \text{K}^{-1}$ ) is the thermal conductivity of CO.

$$j_H = 1.08 j_D = 0.4914$$

$$h = 8.5 \text{ J} \cdot \text{s}^{-1} \cdot \text{cm}^{-2} \cdot \text{K}^{-1} = 2.03 \text{ cal} \cdot \text{s}^{-1} \cdot \text{cm}^{-2} \cdot \text{K}^{-1}$$

$$\begin{aligned} \left| \frac{-\Delta H \ddot{R}_p}{h T_b} \right| &= \left| \frac{41.7 \times 238.9 \times 1.1 \times 10^{-4} \times 0.0075}{2.03 \times 473.15} \right| = 8 \times 10^{-6} < 0.15 \frac{RT_b}{E} = 0.15 \\ &= 0.013 \end{aligned}$$

Therefore, interphase heat transfer limitation had been eliminated.

## 2.2. Eliminating interparticle heat transfer limitation

The criterion requires:

$$\left| \frac{-\Delta H \ddot{R}_b R_o^2}{k_e T_w} \right| < 0.4 \frac{RT_w}{E}$$

where  $k_e$  ( $0.26 \text{ cal} \cdot \text{s}^{-1} \cdot \text{cm}^{-1} \cdot \text{K}^{-1}$ ) is the effective thermal conductivity of the bed (quartz sands),  $\ddot{R}_b$  ( $1.6 \times 10^{-6} \text{ mol} \cdot \text{s}^{-1} \cdot \text{cm}^{-3}$ ) is reaction rate per unit bed volume,  $R_o$  (0.35 cm) is radius of tubular reactor.  $T_w$  is absolute temperature of the reactor wall.

$$\begin{aligned} \left| \frac{-\Delta H \ddot{R}_b R_o^2}{k_e T_w} \right| &= \left| \frac{41.7 \times 238.9 \times 1.6 \times 10^{-6} \times 0.35^2}{0.26 \times 473.15} \right| = 1.6 \times 10^{-5} < 0.4 \frac{RT_w}{E} = 0.4 \times \\ &= 0.035 \end{aligned}$$

Therefore, interparticle heat transfer limitation had been eliminated.
